# Supplementary material for: Multiple aptamer recognition-based quantum dot lateral flow platform: ultrasensitive point-of-care testing of respiratory infectious diseases
Source: Royal Society of Chemistry journal article supplement (doi:10.1039/d4tb01946f), 2024-12-04
Supplement: d4tb01946f1.pdf [file d4tb01946f1.pdf]

## Supplementary Information for

# Multiple Aptamers Recognition based Quantum dots Lateral Flow Platform: An Ultrasensitive Point-of-Care Testing of Respiratory Infectious Diseases

Hengxuan Li,<sup>a,b</sup> Xiaoyi Fu,<sup>\*b,c</sup> Qimin You,<sup>d</sup> Dawei Shi,<sup>e</sup> Lingxuan Su,<sup>f</sup> Minghui Song,<sup>b</sup> Ruizi Peng,<sup>b</sup> Ting Fu,<sup>b</sup> Peng Wang<sup>\*b</sup> and Weihong Tan<sup>\*b,g</sup>

*a. Medical School, Faculty of Medicine, Tianjin University, Tianjin 300072, P. R. China.*

*b. Zhejiang Cancer Hospital, The Key Laboratory of Zhejiang Province for Nucleic Acids, Hangzhou Institute of Medicine (HIM), Chinese Academy of Sciences, Hangzhou, 310022, P. R. China. E-mail: [chemwangp@hnu.edu.cn](mailto:chemwangp@hnu.edu.cn), [tan@hnu.edu.cn](mailto:tan@hnu.edu.cn)*

*c. Hangzhou Aptech Biotechnology Company Limited, Hangzhou 310022, P. R. China. E-mail: [fxystudy@163.com](mailto:fxystudy@163.com)*

*d. Ustar Biotechnologies (Hangzhou) Company Limited, Hangzhou 310051, P. R. China.*

*e. National Institutes for Food and Drug Control, Beijing 100050, P. R. China.*

*f. Key Laboratory of Public Health Detection and Etiological Research of Zhejiang Province, Zhejiang Provincial Center for Disease Control and Prevention, Hangzhou 310050, P. R. China.*

*g. Institute of Molecular Medicine (IMM), Renji Hospital, Shanghai Jiao Tong University School of Medicine, and College of Chemistry and Chemical Engineering, Shanghai Jiao Tong University, Shanghai, 200240, P. R. China.*

## Supplementary Methods

### Materials and Instruments

All DNA sequences were synthesized by Sangon Biotech (Shanghai, China). All sequences are listed in Table S1. 1-(3-Dimethylaminopropyl)-3-ethylcarbodiimide (EDC), N-Hydroxysuccinimide (NHS), 2-Morpholinoethanesulphonic acid (MES) and Streptavidin (SA) was acquired from Solarbio (Beijing, China). (3-Mercaptopropyl) trimethoxysilane (MPTS), n-hexane octyl trimethoxysilane (OTMS), ammonia 3-aminopropyltriethoxysilane (APTES), and Succinic anhydride were purchased from Sigma-Aldrich (Missouri, USA). Oil-Soluble Quantum Dots were acquired from Wuhanjiayuan Quantumdots (Wuhan, China). Influenza B (B/Victoria/705/2018) virus nucleoprotein, SARS-CoV-2 (2019-nCoV) N protein and other coronavirus N protein were purchased from Sino Biological (Beijing, China). Anti-influenza B virus nucleoprotein antibody and anti-SARS-CoV-2 N protein antibody were purchased from Fapon Biotech (Dongguan, China). Recombinant anti-SA antibody was purchased from Bioeast (Hangzhou, China). All other reagents were purchased from the National Pharmaceutical Group Chemical Reagent (Shanghai, China). The polyvinylchloride (PVC) backing card (YN-Jn8100), glass fiber membrane sample pad (YN-Jn8301), polyester fiber membrane conjugate pad (YN-Jn8309), nitrocellulose (NC) membrane (YN120), absorbent pad (YN-Jn8201) and plastic card case (YNC-9) were purchased from YiNeng Biotech Co., Ltd. (Guangzhou, China). The dispensing platform was obtained from Kinbio Tech Co., Ltd. (Shanghai, China).

RT PCR was performed on the Light Cycler 96 Real-Time PCR System (Roche). Surface plasmon resonance (SPR) experiments were used to test the affinity of aptamers toward different kinds of proteins by BIAcore T200 biosensor system. Transmission electron microscopy (TEM) analyses and elemental mapping scanning were performed on the JEM-F200 field emission TEM. Scanning electron microscopy (SEM) analyses were performed on the JSM-IT800 field emission SEM. Dynamic light scattering and zeta ( $\zeta$ ) potentials were measured with the Zetasizer Nano ZS ZEN3600 particle and molecular charge analyzer.

The portable fluorescence reader was co-developed with Ustar Biotechnologies (Hangzhou) Company Limited, which consists of photodiode, focusing mirror, 625 nm pass filter, dichroic mirror, focusing/collimator group, step motor, LED light source and narrow band filter. All components of the portable fluorescence reader are derived from commercially available components and parts. The device control and data reading are performed using serial port/network data debugging software (SSCOM V 5.13.1).

## **Synthesis of Dendritic mesoporous silica nanoparticles (DMSN)**

DMSNs applied to enrich QDs were synthesized according to reported method.<sup>1</sup> In a typical synthesis process, 0.3 mg/mL 80 mL TEA aqueous solution was stirred at 80°C for 30 min, followed by the addition of 130 mg CTAB and 56 mg NaSal and stirred for 1 h at 80°C. The solution was injected with 1.3 mL TEOS and allowed to be gently stirred for 2 h at 80 °C. The dimension and pore size of nanospheres could be tuned by adjusting reaction parameters as previously reported<sup>2</sup>. Subsequently, the precipitate was collected after centrifugation at 10000 rpm for 5 min. The mixture was finally dispersed in 50 mL HCl/methanol 1:1 mixture and stirred at 60 °C for 6 h, and then repeat once to extract the residue organic templates. The extraction was repeated once and the dendritic silica spheres were finally dispersed in 35 mL of ethanol. The above dendritic silica ethanol solution was added with 850 µL of ammonia and 350 µL of MPTS, followed by vigorous stirring at room temperature for 12 h. The finally product DMSNs was harvested by centrifugation, dispersed in 16.7 mL ethanol.

## **Synthesis of DMSN/QDs/SiO<sub>2</sub> (MQS)**

For the assembling of QDs by DMSNs, the thiolated DMSNs were used for OTMS-capped QDs incorporation. In brief, a wet precipitate of 6mg DMSN was added with 1mL 3mg/mL QDs chloroform solution and sonicated for 5 min to obtain a clear solution. The DMSN/QDs composites were recovered by centrifugation at 10000 rpm for 5 min and dissolved by 50uL OTMS, 7.5mL methanol and 95 µL ammonia. The aqueous phase transfer of composites was realized by sonicating the above mixture for 30 min and then centrifugation. To grow the silica shell by Stöber method<sup>3</sup>, the precipitate incubate with 10mL ethanol, 2.5 mL pure water, 315 µL ammonia and 6.25 µL TEOS for 2 h. After centrifugation, we obtained the DMSNs/QDs/SiO<sub>2</sub> spheres (MQS). The MQS added with 250 µL ammonia and 10 µL APTES and reacted for 12 h to obtain amino-group. The amino-terminated MQS dispersed in 5mL DMF containing 5 mg/mL succinic anhydride and reacted for 4 h to form the carboxyl-terminated MQS. The production was washed with ethanol and water several times, and dispersed in 0.1M MES buffer (pH 6).

## **Pretreatment of the sample pad and absorbent pad**

The pretreatment steps for sample pads and conjugate pads in LFIA are critical for optimizing the performance of the assay. Soaked the sample pad in the buffer solution (Tris-HCl, Tween-20, PVP k30, sucrose in the appropriate proportions) for 30 minutes, then dried the sample pad overnight at 37°C

until completely dry. Treated the conjugate pad the same way as the sample pad, and the buffer solution for treating the conjugate pad included Tris-HCl, PVP k30, isopropanol, NaCl and trehalose.

## Supplementary Figures

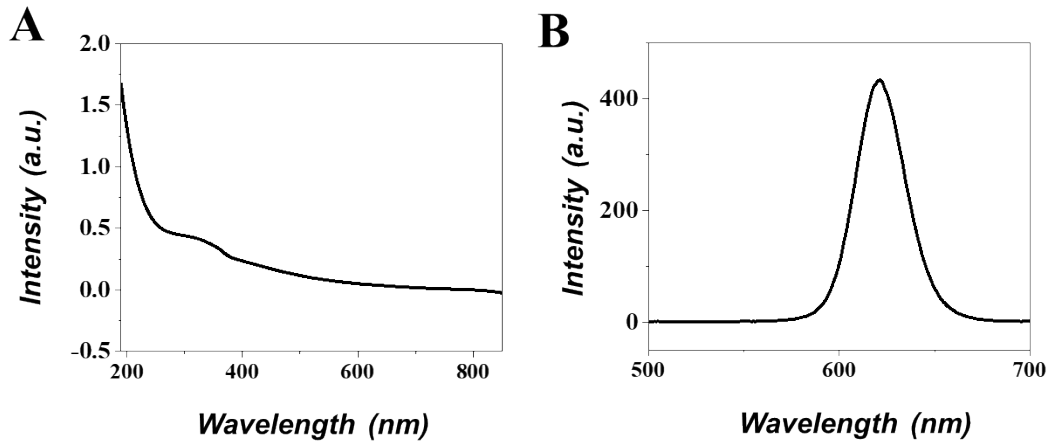

Fig. S1 (A) The UV-Vis absorption spectrum of ApMQS. (B) The fluorescence emission spectrum of ApMQS. (Excitation: 365 nm; Emission: 625 nm)

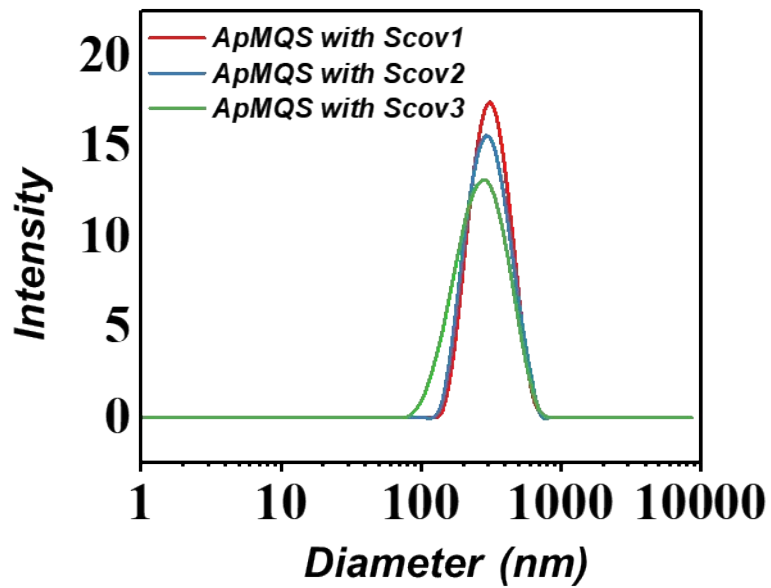

Fig. S2 The hydrodynamic diameter distributions of ApMQS with different aptamers (Scov1, Scov2, Scov3).

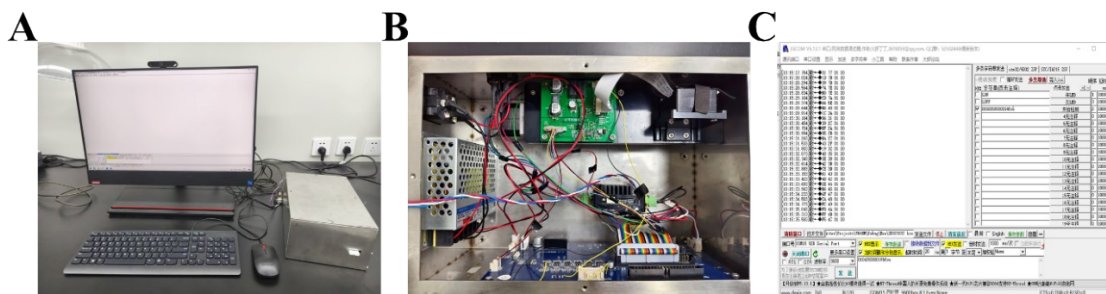

Fig. S3 (A) The appearance photo of the portable fluorescence reader with the matching computer. (B) The internal structure photo of the portable fluorescence reader. (C) The main interface of the fluorescence signal processing software.

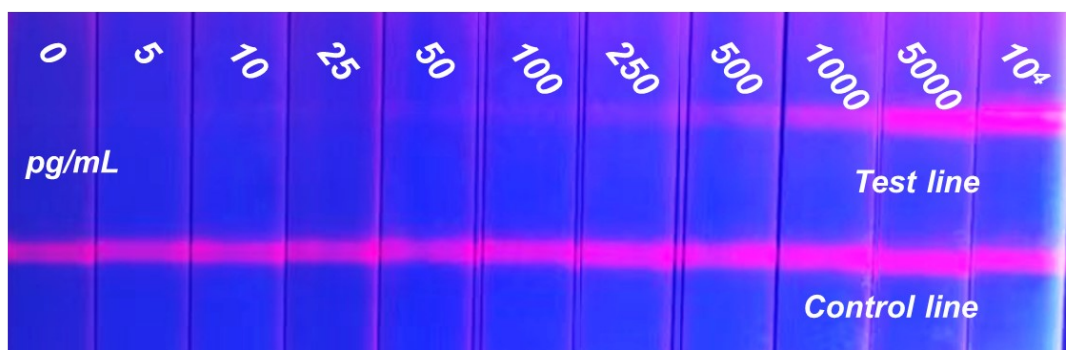

Fig. S4 The photograph of ApMQS-LFA detection results of N protein concentration (10000, 5000, 1000, 500, 250, 100, 50, 25, 10, 5, 0 pg/mL) under UV light (Light source from right).

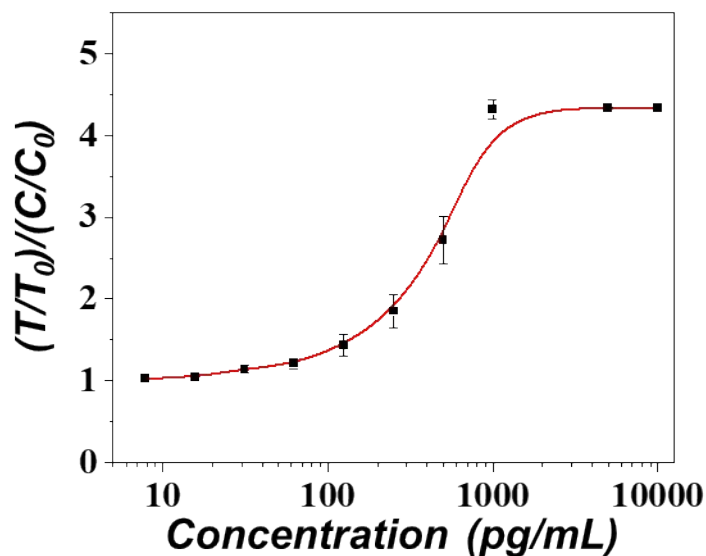

Fig. S5 Curve of SARS-CoV-2 N protein concentration (10000, 5000, 1000, 500, 250, 100, 50, 25, 10, 5, 0 pg/mL) and T/C value (T and C represent the detection values of T and C lines under the corresponding N protein concentration, T<sub>0</sub> and C<sub>0</sub> represent the detection values of T and C lines under the blank control). Error bars represent the standard deviation of three parallel experiments.

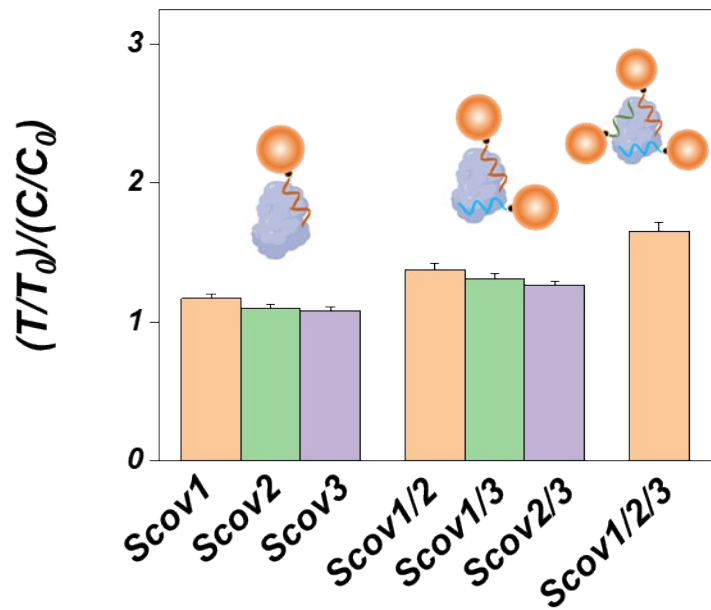

Fig. S6 Detection results of different combinations of Scov1, Scov2 and Scov3 under 100 pg/mL N protein concentration.

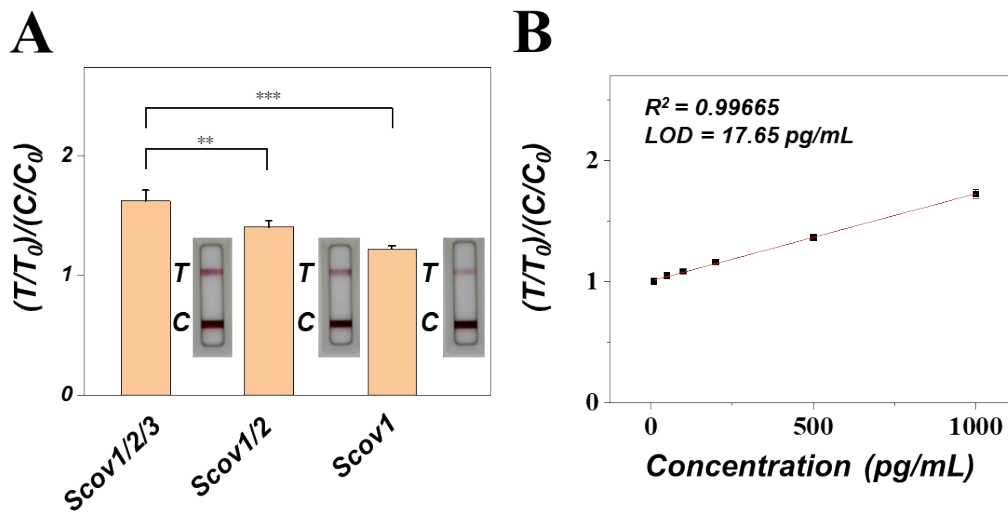

Fig. S7 (A) Detection results of different combinations of Scov1, Scov2 and Scov3 under 1 ng/mL SARS-CoV-2 N protein concentration by AuNPs-LFIA. (B) The standard curve of SARS-CoV-2 N protein detection on AuNPs-LFIA. \*  $p < 0.05$ , \*\*  $p < 0.01$ , \*\*\*  $p < 0.001$ .

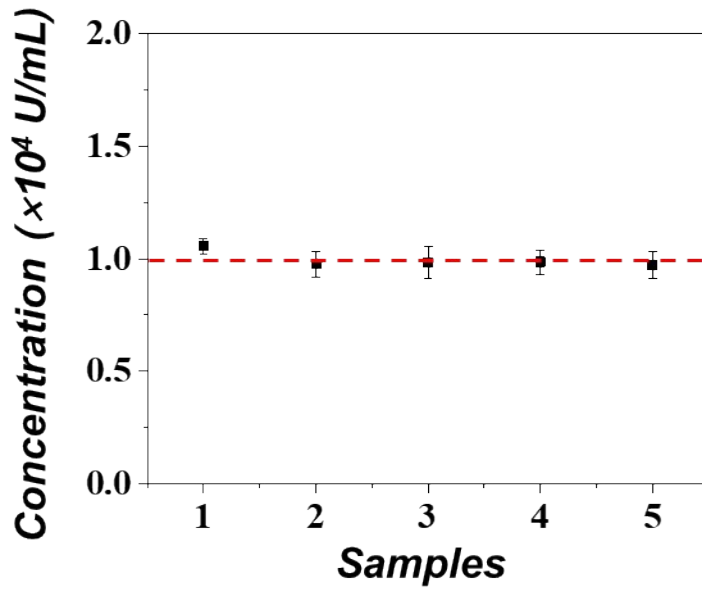

Fig. S8. Detection results of inactivated SARS-CoV-2 recovery (the red line represents the concentration:  $10^5$  U/ml). Error bars represent the standard deviation of three parallel experiments.

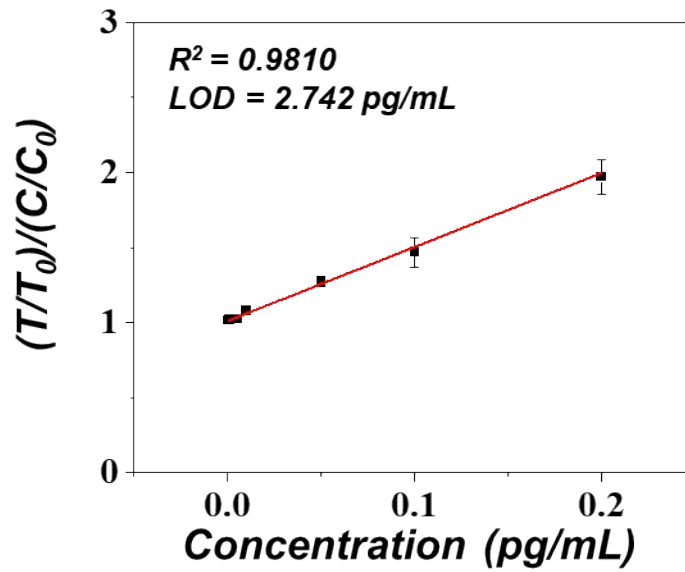

Fig. S9. The standard curve of the influenza B virus nucleoprotein concentration and  $(T/T_0)/(C/C_0)$  value.



## Supplementary Tables

Tab. S1 The sequences of SARS-CoV-2 N protein aptamers and the initial library and the primers used in SELEX.

| DNA species   | Sequence (5' to 3')                                                       |
|---------------|---------------------------------------------------------------------------|
| DNA library1  | <i>GTTTCGTGGTGTGCTGGATGT(N)<sub>36</sub>TGACACATCCAGCAGCACGA</i>          |
| Primer1-S     | <i>GTTTCGTGGTGTGCTGGATGT</i>                                              |
| Primer1-S-FAM | <i>FAM-GTTTCGTGGTGTGCTGGATGT</i>                                          |
| Primer1-A     | <i>TCGTGCTGCTGGATGTGTCA</i>                                               |
| Scov1         | <i>CGCCTCCTTCTCTCGGGGTGTGTAGGGTCAGGGAGTGTGAGAGGA<br/>GGAGACGAGATCGGCG</i> |
| Scov2         | <i>CACGTCGGGGGGGTCACACATGAACCGTGCGGATACGGAGACGAG</i>                      |
| Scov3         | <i>CGCCTCCTTCCACGGGATCGGATCCCCACTCGGCTCTATCGGATTGG<br/>AGACGAGATCGGCG</i> |

(N)<sub>36</sub> represents 36 nucleotides with equimolar incorporation of A, G, C, and T at each position.

Tab. S2 The sequences of Influenza B virus nucleoprotein aptamers and the initial library and the primers used in SELEX.

| Aptamer        | Sequence(5' to 3')                                                    |
|----------------|-----------------------------------------------------------------------|
| DNA library2   | <i>TTCAGCACTCCACGCATAGC(N)<sub>36</sub>CCTATGCGTGCTACCGTGAA</i>       |
| Primer2-S1     | <i>TTCAGCACTCCACGCATAGC</i>                                           |
| Primer2-S2-FAM | <i>FAM-TTCAGCACTCCACGCATAGC</i>                                       |
| Primer2-A      | <i>TTCACGGTAGCACGCATAGG</i>                                           |
| FluB1          | <i>TTTACGCATAGCGGAGGGACGCCAACAGTTCCGGAGGTTTATCGGG<br/>GCCTATGCGT</i>  |
| FluB2          | <i>TTTACGCATAGCAAGTCCGCGTTCGTTCCCGGTCATTGCCTTGTGGTGC<br/>CTATGCGT</i> |
| FluB3          | <i>TTTACGCATAGCCGATCCGGTTGATGCACCGGTTAAGGCCTTGTGGT<br/>GCCTATGCGT</i> |

Tab. S3 The  $k_a$ ,  $k_d$ , and  $K_D$  values of aptamers targeting the SARS-CoV-2 N protein.

| Injection variables<br>Analyte Solution | 1:1 binding $k_a$<br>(1/Ms) | $k_d$ (1/s) | $K_D$ (M)      |
|-----------------------------------------|-----------------------------|-------------|----------------|
| Scov1                                   | 8.20e+4                     | 1.97e-4     | <b>2.41e-9</b> |
| Scov2                                   | 1.68e+5                     | 5.43e-4     | <b>3.24e-9</b> |
| Scov3                                   | 5.90e+5                     | 2.54e-3     | <b>4.31e-9</b> |

Tab. S4 The  $k_a$ ,  $k_d$ , and  $K_D$  values of aptamers targeting the influenza B virus nucleoprotein.

| Injection variables<br>Analyte Solution | 1:1 binding $k_a$<br>(1/Ms) | $k_d$ (1/s) | $K_D$ (M)      |
|-----------------------------------------|-----------------------------|-------------|----------------|
| FluB1                                   | 1.28e+5                     | 1.01e-3     | <b>7.88e-9</b> |
| FluB2                                   | 1.20e+5                     | 7.52e-4     | <b>6.29e-9</b> |
| FluB3                                   | 1.29e+5                     | 1.10e-3     | <b>8.53e-9</b> |

Tab. S5 Two-sample equal variance hypothesis t-test analysis between group of Scov1/2/3 and Scov1 at the concentration of 100 pg/mL of N protein.

| Group                        | Scov1/2/3      | Scov1    |
|------------------------------|----------------|----------|
| Mean                         | 1.641646       | 1.200359 |
| Variance                     | 0.005158       | 0.000777 |
| Observation                  | 5              | 5        |
| Pooled Variance              | 0.002967       |          |
| Hypothetical Mean Difference | 0              |          |
| Degrees of Freedom           | 8              |          |
| t Statistic                  | 12.80907       |          |
| P(T <= t ) One-Tailed        | 6.51E-07       |          |
| t Critical One-Tailed        | 1.859548       |          |
| P(T <= t) Two-Tailed         | <b>1.3E-06</b> |          |
| t Critical Two-Tailed        | 2.306004       |          |

Tab. S6 Two-sample equal variance hypothesis t-test analysis between group of Scov1/2/3 and Scov1/2 at the concentration of 100 pg/mL of N protein.

| Group                        | Scov1/2/3       | Scov1/2     |
|------------------------------|-----------------|-------------|
| Mean                         | 1.641646        | 1.454455867 |
| Variance                     | 0.005158        | 0.001923017 |
| Observation                  | 0.00354         | 5           |
| Pooled Variance              | 0.00354         |             |
| Hypothetical Mean Difference | 0               |             |
| Degrees of Freedom           | 8               |             |
| t Statistic                  | 4.974292        |             |
| P(T <=t ) One-Tailed         | 0.000544        |             |
| t Critical One-Tailed        | 1.859548        |             |
| P(T <= t) Two-Tailed         | <b>0.001087</b> |             |
| t Critical Two-Tailed        | 2.306004        |             |

Tab. S7 Two-sample equal variance hypothesis t-test analysis between group of Scov1/2/3 and Scov1 at the concentration of 5 pg/mL of N protein.

| Group                        | Scov1/2/3      | Scov1    |
|------------------------------|----------------|----------|
| Mean                         | 1.166706       | 1.016008 |
| Variance                     | 0.002107       | 0.000814 |
| Observation                  | 5              | 5        |
| Pooled Variance              | 0.00146        |          |
| Hypothetical Mean Difference | 0              |          |
| Degrees of Freedom           | 8              |          |
| t Statistic                  | -6.23497       |          |
| P(T <=t ) One-Tailed         | 0.000125       |          |
| t Critical One-Tailed        | 1.859548       |          |
| P(T <= t) Two-Tailed         | <b>0.00025</b> |          |
| t Critical Two-Tailed        | 2.306004       |          |

Tab. S8 Two-sample equal variance hypothesis t-test analysis between group of Scov1/2/3 and Scov1/2 at the concentration of 5 pg/mL of N protein.

| Group                        | Scov1/2/3       | Scov1/2  |
|------------------------------|-----------------|----------|
| Mean                         | 1.166706        | 1.099941 |
| Variance                     | 0.002107        | 0.001188 |
| Observation                  | 5               | 5        |
| Pooled Variance              | 0.001648        |          |
| Hypothetical Mean Difference | 0               |          |
| Degrees of Freedom           | 8               |          |
| t Statistic                  | -2.60068        |          |
| P(T <=t ) One-Tailed         | 0.015792        |          |
| t Critical One-Tailed        | 1.859548        |          |
| P(T <= t) Two-Tailed         | <b>0.031585</b> |          |
| t Critical Two-Tailed        | 2.306004        |          |

Tab. S9 Detection results of inactivated SARS-CoV-2 in diluted nasopharyngeal swab samples from healthy individuals

|        | Column 1                        | Column 2                          | Column 3        |
|--------|---------------------------------|-----------------------------------|-----------------|
| Sample | Added<br>(10 <sup>5</sup> U/mL) | Founded<br>(10 <sup>5</sup> U/mL) | Recovery<br>(%) |
| 1      | 1                               | 1.05637                           | 105.64%         |
| 2      | 1                               | 0.9756                            | 97.56%          |
| 3      | 1                               | 0.981366                          | 98.14%          |
| 4      | 1                               | 0.98556                           | 98.56%          |
| 5      | 1                               | 0.969558                          | 96.96%          |

Tab. S10 Welch t-test analysis of detection results inactivated SARS-CoV-2 in diluted nasopharyngeal swab samples from healthy individuals.

| SUMMARY  |                        |          |          |          |
|----------|------------------------|----------|----------|----------|
| Group    | Number of observations | Sum      | Average  | Variance |
| Column 1 | 5                      | 4.968454 | 0.993691 | 0.001264 |
| Column 2 | 5                      | 5        | 1        | 0        |

| Variance analysis  |          |    |          |          |                 |          |
|--------------------|----------|----|----------|----------|-----------------|----------|
| Source of variance | SS       | df | MS       | F        | P-value         | F crit   |
| interblock         | 9.95E-05 | 1  | 9.95E-05 | 0.157452 | <b>0.701888</b> | 5.317655 |
| interclass         | 0.005056 | 8  | 0.000632 |          |                 |          |
| Total              | 0.005156 | 9  |          |          |                 |          |

Tab. S11 Subgroup results of MARQ-LFIA with clinical diagnosis of COVID-19 (N = 50)

|           | Clinical Results |           | Total |
|-----------|------------------|-----------|-------|
|           | Positives        | Negatives |       |
| Positives | 26               | 0         | 26    |
| Negatives | 4                | 20        | 24    |
| Total     | 30               | 20        | 50    |

Tab. S12 Subgroup results of MARQ-LFA with clinical diagnosis of Influenza B (N = 77)

|           | Clinical Results |           | Total |
|-----------|------------------|-----------|-------|
|           | Positives        | Negatives |       |
| Positives | 44               | 0         | 44    |
| Negatives | 13               | 20        | 33    |
| Total     | 57               | 20        | 77    |

Tab. S13 Compositions and specifications of the National Reference Panel for COVID-19 ( SARS-CoV-2 )

Antigen Detection Kit

| Reference type            | Reference number | Pathogen category                  |
|---------------------------|------------------|------------------------------------|
| Positive Reference        | P1               | <i>SARS-CoV-2 (Wild type)</i>      |
|                           | N1               | <i>Staphylococcus aureus</i>       |
|                           | N2               | <i>Streptococcus pneumoniae</i>    |
|                           | N3               | <i>Measles virus</i>               |
|                           | N4               | <i>Mumps virus</i>                 |
|                           | N5               | <i>Adenovirus 3</i>                |
|                           | N6               | <i>Mycoplasma pneumoniae</i>       |
|                           | N7               | <i>Parainfluenza virus 2</i>       |
|                           | N8               | <i>Metapneumovirus</i>             |
| Negative Reference        | N9               | <i>Coronavirus OC43</i>            |
|                           | N10              | <i>Coronavirus 229E</i>            |
|                           | N11              | <i>Bordetella pertussis</i>        |
|                           | N12              | <i>Influenza B virus Victoria</i>  |
|                           | N13              | <i>Influenza B virus Yamagata</i>  |
|                           | N14              | <i>Influenza A virus H1N1 2009</i> |
|                           | N15              | <i>Influenza A virus H3N2</i>      |
|                           | N16              | <i>Avian influenza virus H7N9</i>  |
|                           | N17              | <i>Avian influenza virus H5N6</i>  |
|                           | N18              | <i>Epstein-barr virus</i>          |
|                           | N19              | <i>Enterovirus CA16</i>            |
|                           | N20              | <i>Rhinovirus</i>                  |
| Detection Limit Reference | S                | <i>SARS-CoV-2 (Wild type)</i>      |

Tab. S14 Compositions and specifications of the 2nd National Reference Panel for Influenza B Viral Antigens

Detection Kit

| Reference type            | Reference number | Pathogen category                                                               |
|---------------------------|------------------|---------------------------------------------------------------------------------|
| Positive Reference        | P1               | <i>Influenza B virus Yamagata</i>                                               |
|                           | N1               | <i>Staphylococcus aureus</i>                                                    |
|                           | N2               | <i>Streptococcus pneumoniae</i>                                                 |
|                           | N3               | <i>Measles virus</i>                                                            |
|                           | N4               | <i>Mumps virus</i>                                                              |
|                           | N5               | <i>Adenovirus 3</i>                                                             |
|                           | N6               | <i>Adenovirus 7</i>                                                             |
|                           | N7               | <i>Mycoplasma pneumoniae</i>                                                    |
|                           | N8               | <i>Parainfluenza virus 2</i>                                                    |
|                           | N9               | <i>Metapneumovirus</i>                                                          |
| Negative Reference        | N10              | <i>Coronavirus OC43</i>                                                         |
|                           | N11              | <i>Coronavirus 229E</i>                                                         |
|                           | N12              | <i>Bordetella pertussis</i>                                                     |
|                           | N13              | <i>Epstein-barr virus</i>                                                       |
|                           | N14              | <i>Enterovirus CA16</i>                                                         |
|                           | N15              | <i>Respiratory syncytial virus</i>                                              |
|                           | N16              | <i>Rhinovirus A</i>                                                             |
|                           | N17              | <i>Neisseria meningitidis</i>                                                   |
|                           | N18              | <i>SARS-CoV-2 Omicron</i>                                                       |
|                           | N19              | <i>Negative swab</i>                                                            |
|                           | N20              | <i>Interference sample</i><br><i>(Dexamethasone sodium phosphate, 0.4mg/mL)</i> |
| Detection Limit Reference | S                | <i>Influenza B virus (Victoria)</i>                                             |

Tab. S15 The clinical COVID-19 positive samples detection original data of MARQ-LFIA

| No.        | C Value  | T Value |
|------------|----------|---------|
| 2023-31032 | 10398940 | 1112835 |
| 2023-31033 | 11459213 | 6888464 |
| 2023-31034 | 10124549 | 4041524 |
| 2023-31037 | 11449218 | 7176999 |
| 2023-31038 | 10755859 | 4794779 |
| 2023-31039 | 11360164 | 1989929 |
| 2023-31040 | 11072139 | 5844426 |
| 2023-31041 | 11685217 | 7922533 |
| 2023-31042 | 11985293 | 6013233 |
| 2023-31043 | 10853856 | 148950  |
| 2023-31044 | 11327775 | 860939  |
| 2023-31045 | 10276262 | 6304522 |
| 2023-31046 | 11621179 | 5379917 |
| 2023-31047 | 11881102 | 7206131 |
| 2023-31048 | 11916161 | 5829075 |
| 2023-31049 | 10306946 | 4181180 |
| 2023-31050 | 11608469 | 107903  |
| 2023-31051 | 10946499 | 3690656 |
| 2023-31052 | 11804628 | 3811305 |
| 2023-31053 | 11396280 | 7073993 |
| 2023-31054 | 11710889 | 3149389 |
| 2023-31055 | 11138778 | 88907   |
| 2023-31056 | 10833777 | 2339463 |
| 2023-31057 | 10202404 | 2771588 |
| 2023-31058 | 10789175 | 117062  |
| 2023-31059 | 11384512 | 437806  |
| 2023-31060 | 10349539 | 652418  |
| 2023-31061 | 10655764 | 3910601 |
| 2023-31063 | 11936650 | 3420451 |
| 2023-31065 | 11734746 | 2902792 |
| 2023-31080 | 11069288 | 297787  |



|            |          |        |
|------------|----------|--------|
| 2023-31081 | 10770695 | 151562 |
| 2023-31082 | 10414407 | 235188 |
| 2023-31083 | 11546419 | 87239  |
| 2023-31084 | 10274561 | 105806 |
| 2023-31085 | 10520323 | 95786  |
| 2023-31086 | 11569857 | 295807 |
| 2023-31087 | 10640152 | 75098  |
| 2023-31088 | 10136816 | 169367 |
| 2023-31089 | 11335932 | 185730 |
| 2023-31090 | 11048309 | 99612  |
| 2023-31091 | 11747354 | 261444 |
| 2023-31092 | 10570315 | 153930 |
| 2023-31093 | 11932833 | 136241 |
| 2023-31094 | 11728615 | 214184 |
| 2023-31095 | 10672833 | 135771 |
| 2023-31096 | 10364673 | 107729 |
| 2023-31097 | 11973452 | 226471 |
| 2023-31098 | 11611284 | 102483 |
| 2023-31099 | 11645529 | 231865 |

---

Tab. S16 The clinical Flu B positive samples detection original data of MARQ-LFIA.

| No.        | C Value  | T Value |
|------------|----------|---------|
| 1002234709 | 10382813 | 1047989 |
| 0102234701 | 11977320 | 7982106 |
| 0108234703 | 11951375 | 7659704 |
| 0102234805 | 11462965 | 5251923 |
| 0108234803 | 10131095 | 1934427 |
| 0802234709 | 11264851 | 193752  |
| 0602234812 | 11108388 | 158424  |
| 203234537  | 11801633 | 5283190 |
| 0503235210 | 11674210 | 4189879 |
| F232119    | 11171868 | 273282  |
| F232120    | 11715321 | 1909577 |
| F20231162  | 11447069 | 255430  |
| F23-1180   | 11362068 | 1933714 |
| 231110     | 10330038 | 113710  |
| F231961    | 11580466 | 743126  |
| 1002234827 | 11249632 | 1557679 |
| 23-1-1310  | 11989494 | 6529002 |
| 20231298   | 10635027 | 4809275 |
| F20231265  | 10179738 | 504240  |
| F20231271  | 11003505 | 6751042 |
| F20231359  | 10912824 | 158401  |
| F20231388  | 10694563 | 452094  |
| F20231389  | 11379323 | 1919620 |
| 2023-2311  | 10850711 | 7152954 |
| 1002234923 | 11449540 | 202339  |
| 1002234924 | 10487109 | 7779544 |
| 1002234934 | 10446232 | 4847200 |
| 1002235218 | 10712880 | 6528535 |
| 1002235229 | 11968340 | 173013  |
| 1002235234 | 10490225 | 2057546 |
| 0902234611 | 11031140 | 517118  |

---

|             |          |         |
|-------------|----------|---------|
| 0902234829  | 10440885 | 2921914 |
| 1082234701  | 11087527 | 2137520 |
| 1082234830  | 11957943 | 458067  |
| 0102234707  | 10119101 | 3963132 |
| 0108234905  | 11647757 | 871547  |
| 0802234713  | 10145206 | 296437  |
| 0802235005  | 11540209 | 3743988 |
| 0782234904  | 11894167 | 70362   |
| 0602234611  | 11499825 | 5774919 |
| 0602234602  | 10492431 | 4530180 |
| 203234549   | 11670274 | 133491  |
| 203234558   | 11846281 | 6108641 |
| 0784234603  | 10882771 | 113472  |
| 0784234811  | 10136278 | 800285  |
| 1102234710  | 10732619 | 3740706 |
| 1102234911  | 11376194 | 6891307 |
| 0303234608  | 10460449 | 5284494 |
| 0303234802  | 11232206 | 3687856 |
| 0503234704  | 10748856 | 1301908 |
| 0502234811  | 11684526 | 5997662 |
| Flu20231064 | 10737246 | 7895771 |
| JH20231093  | 10168129 | 3726927 |
| F20231061   | 10986557 | 5241390 |
| F20231147   | 10745128 | 2115567 |
| 231148      | 11290526 | 141629  |
| 15342       | 10299274 | 4524969 |
| 23-2-1176   | 11148209 | 274209  |
| 23-2-1181   | 10645193 | 239096  |
| 20240106    | 10405477 | 100661  |
| 20240107    | 11235008 | 169941  |
| 20240108    | 11785249 | 277551  |
| 20240109    | 10092146 | 108881  |
| 20240113    | 11088184 | 153143  |

---

|          |          |        |
|----------|----------|--------|
| 20240116 | 10983410 | 156585 |
| 20240120 | 11119238 | 231300 |
| 20240121 | 10172772 | 222898 |
| 20240122 | 10665659 | 176864 |
| 20240125 | 10269603 | 201974 |
| 20240129 | 11427844 | 134585 |
| 20240130 | 10816946 | 248407 |
| 20240131 | 11443474 | 266324 |
| 20240132 | 11199202 | 74668  |
| 20240133 | 11345167 | 163582 |
| 20240134 | 11924283 | 235036 |
| 20240135 | 11234731 | 160600 |
| 20240136 | 11789281 | 87043  |

---

## References

1. L. Huang, T. Liao, J. Wang, L. Ao, W. Su and J. Hu, *Adv. Funct. Mater.*, 2018, **28**, 1705380.
2. T.-H. Le, S. Kim, S. Chae, Y. Choi, C. S. Park, E. Heo, U. Lee, H. Kim, O. S. Kwon and W. B. Im, *J. Colloid Interface Sci.*, 2020, **564**, 88-98.
3. A. d. S. da Silva and J. H. Z. Dos Santos, *Adv. Colloid Interface Sci.*, 2023, **314**, 102888.
